# Supplementary material for: LINC01714 Enhances Gemcitabine Sensitivity by Modulating FOXO3 Phosphorylation in Cholangiocarcinoma
Source: PubMed Central journal article supplement — Mol Ther Nucleic Acids. 2019 Nov 30;19:446–57. doi: 10.1016/j.omtn.2019.11.028 (PMC6948235; doi:10.1016/j.omtn.2019.11.028), 2019-11-30
Supplement: mmc1.pdf [file mmc1.pdf]

**OMTN, Volume 19**

**Supplemental Information**

**LINC01714 Enhances Gemcitabine**

**Sensitivity by Modulating FOXO3**

**Phosphorylation in Cholangiocarcinoma**

**Sheng Shen, Jiwen Wang, Bohao Zheng, Ying Tao, Min Li, Yueqi Wang, Xiaoling Ni, Tao Suo, Houbao Liu, Han Liu, and Jiwei Zhang**

## Supplementary Methods

### **Pan-cancer expression level of LINC01714**

The RNA-seq mRNA levels of LINC01714 in 33 cancer types (including both cancer and adjacent normal samples) were obtained from GDC database (<https://portal.gdc.cancer.gov/>). Then the expression variations in different cancer types were compared.

### **5' and 3' RACE assay**

The transcriptional initiation and termination sites of LINC0714 was determined by using 5' and 3' RACE assay. The 5' and 3' RACE assays were performed by employing a SMARTer RACE cDNA Amplification kit (Clontech, California, USA) according to the manufacturer's instructions.

### **Subcellular fractionation**

The Nuclear/Cytoplasmic Isolation kit (Thermo Fisher Scientific, Carlsbad, California, USA) was used to extract the cytoplasmic and nuclear fraction of CCLP1 cells according to the manufacturer's instructions.  $\beta$ -actin served as cytoplasmic endogenous control and U6 RNA served as nuclear endogenous control.

### **Gene set enrichment analysis**

To further explore the biological processes that LINC01714 might be involved, we performed gene set enrichment analysis of LINC01714-knockdown profiles. The GSEA software (<http://software.broadinstitute.org/gsea/index.jsp>) [1] was employed to test the most changed genes were enriched in which gene sets of biological processes annotated in the Molecular Signatures Database (MSigDB).

## **Reference**

- [1] Subramanian A, Tamayo P, Mootha VK, Mukherjee S, Ebert BL, Gillette MA, et al. Gene set enrichment analysis: A knowledge-based approach for interpreting genome-wide expression profiles. *Proc Natl Acad Sci U S A* 2005;102:15545–50. doi:10.1073/pnas.0506580102.

## Supplementary Figures

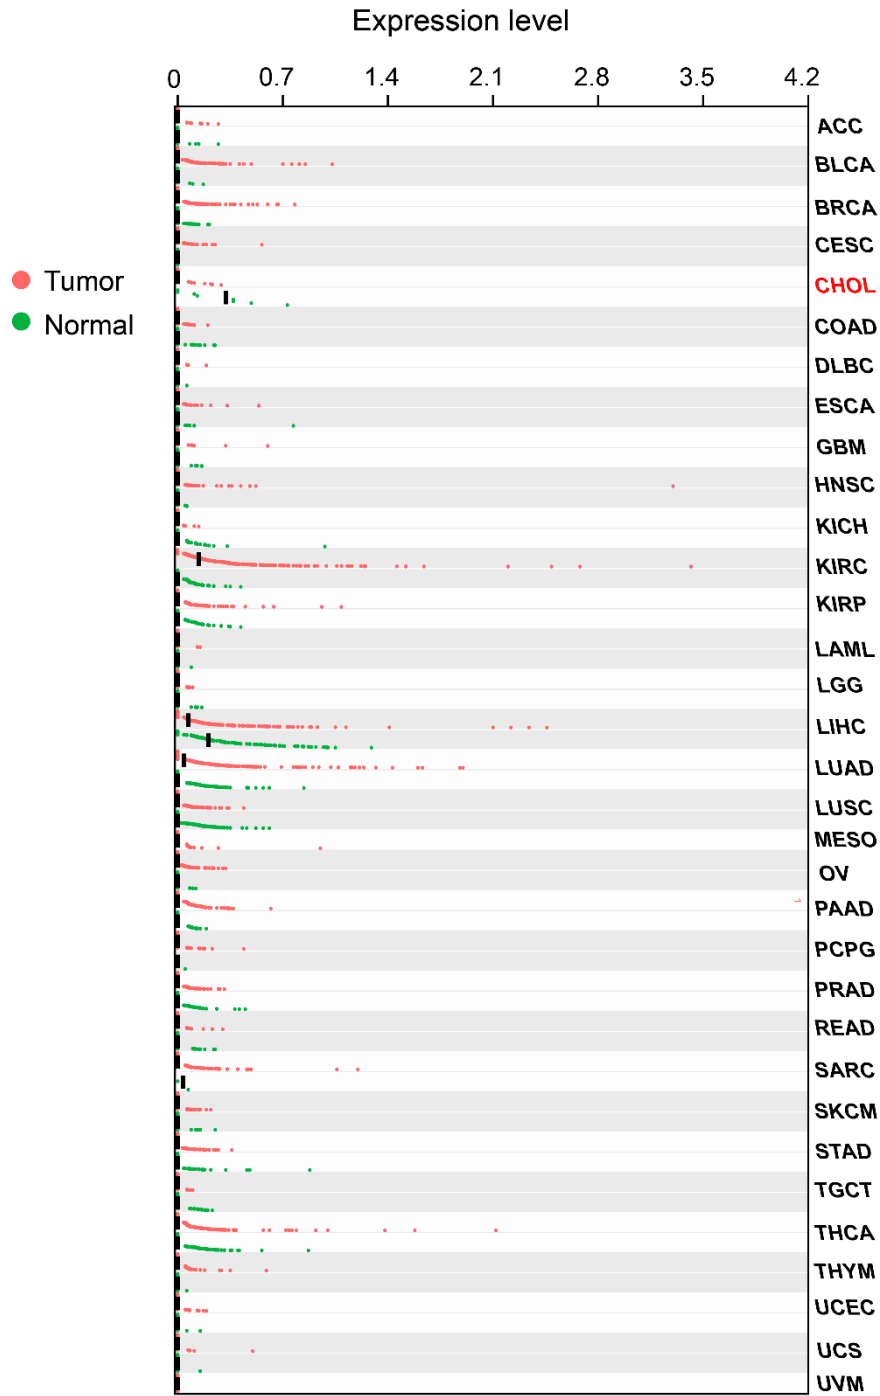

**Figure S1.** The expression of LINC01714 in tumor and corresponding adjacent normal samples across 33 TCGA tumor types. CCA cohort is marked in red font (CHOL).

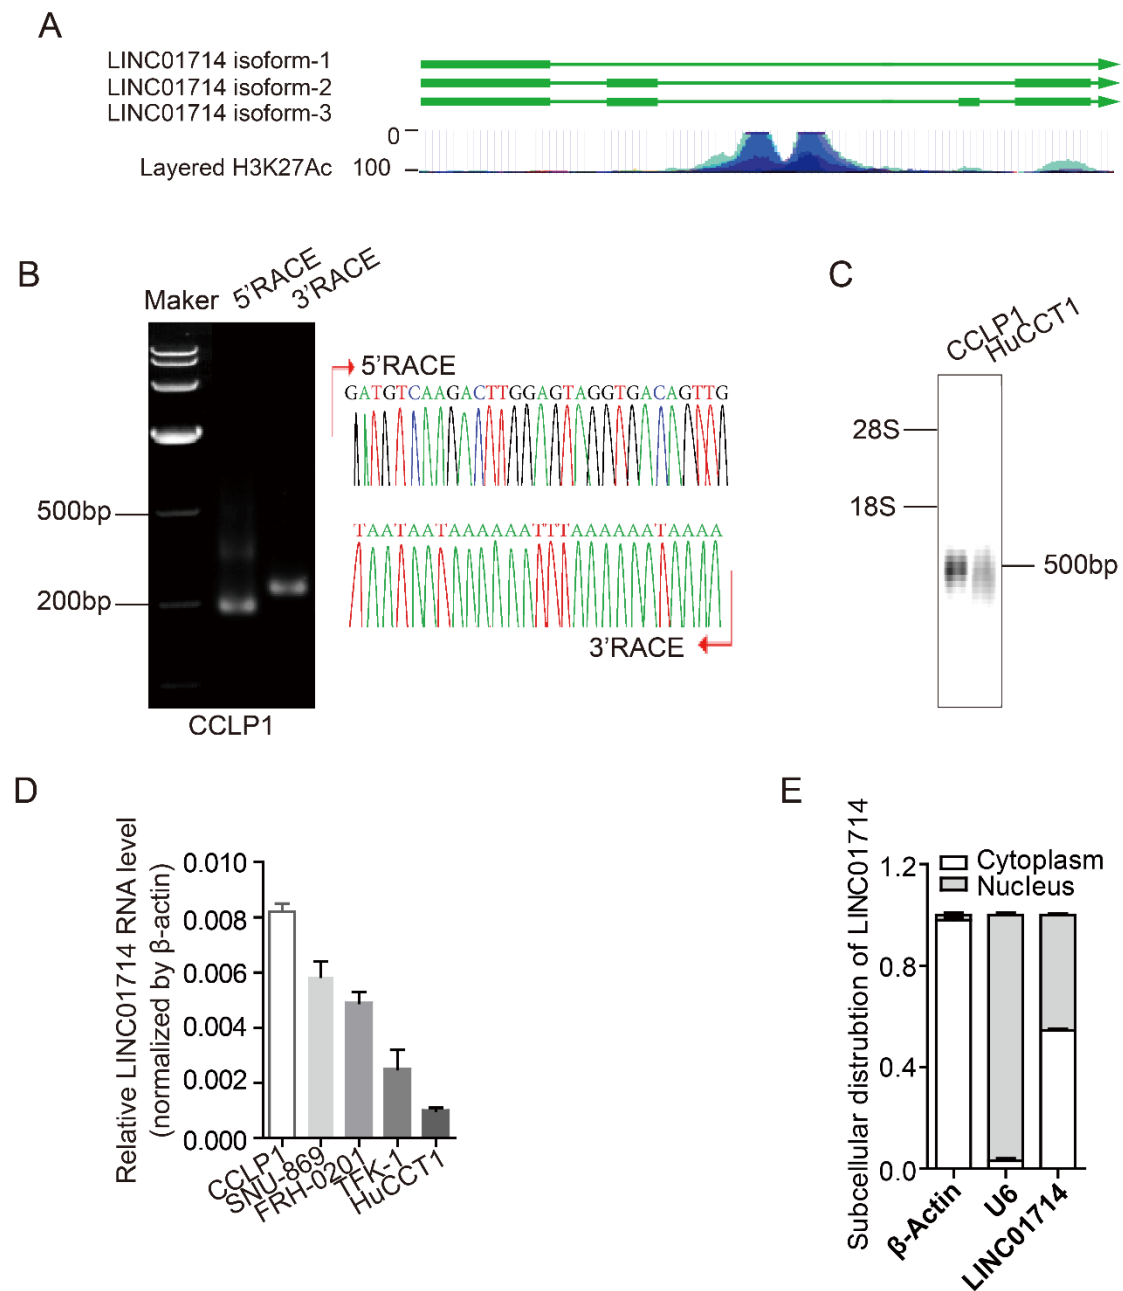

**Figure S2. Characterization of long intergenic non-coding RNA LINC01714 in CCA.** (A) Isoform information of LINC01714. (B) Identification of full-length LINC01714 in CCLP1 cells. Representative images and the boundary of the PCR products from 5' RACE and 3' RACE were shown. (C) Northern blot results for LINC01714 in HuCCT1 and CCLP1 cell lines. (D) Relative LINC01714 RNA levels in CCA cell lines. (E) The distribution of LINC01714 in cytoplasm and nucleus of CCA cells.  $\beta$ -actin serves as cytoplasmic marker and U2 serves as nuclear marker. Values are shown as mean  $\pm$  SEM.

**A** Protein coding potential

| Metric                           | Raw result | Interpretation |
|----------------------------------|------------|----------------|
| PRIDE reprocessing 2.0           | 0          | non-coding     |
| Lee translation initiation sites | 0          | non-coding     |
| PhyloCSF score                   | -46.0469   | non-coding     |
| CPAT coding probability          | 5.78%      | non-coding     |
| Bazzini small ORFs               | 0          | non-coding     |

<https://lncipedia.org/db/transcript/LINC01714:36>

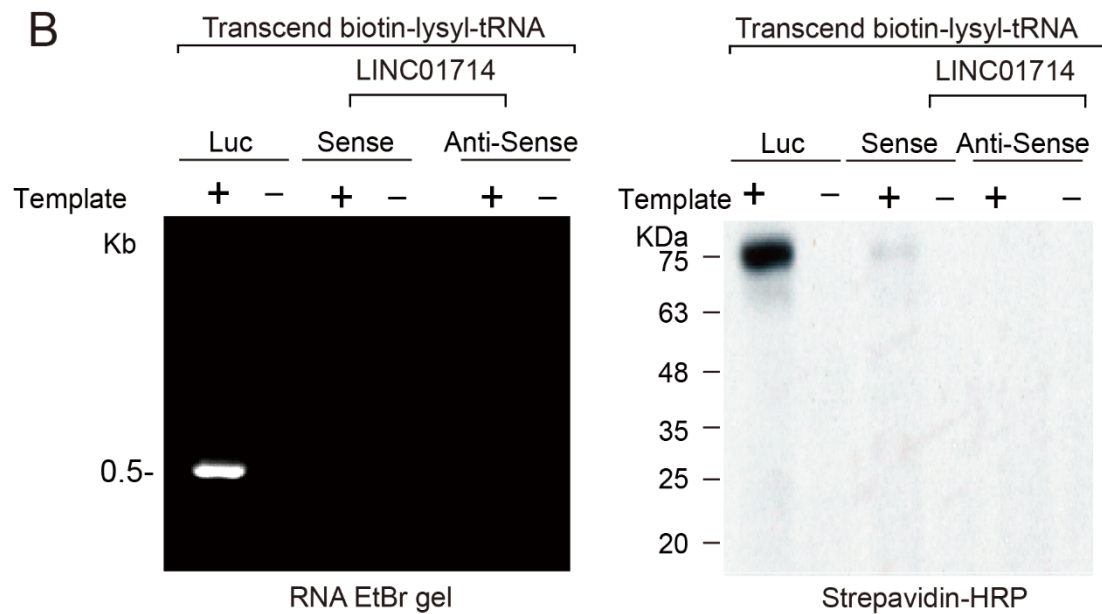

**Figure S3.** (A) The protein coding potential prediction of LINC01714 from LNCipedia database. (B) *In vitro* transcription and translation of LINC01714 sense or antisense transcript. Luciferase (Luc) is used as a positive control.

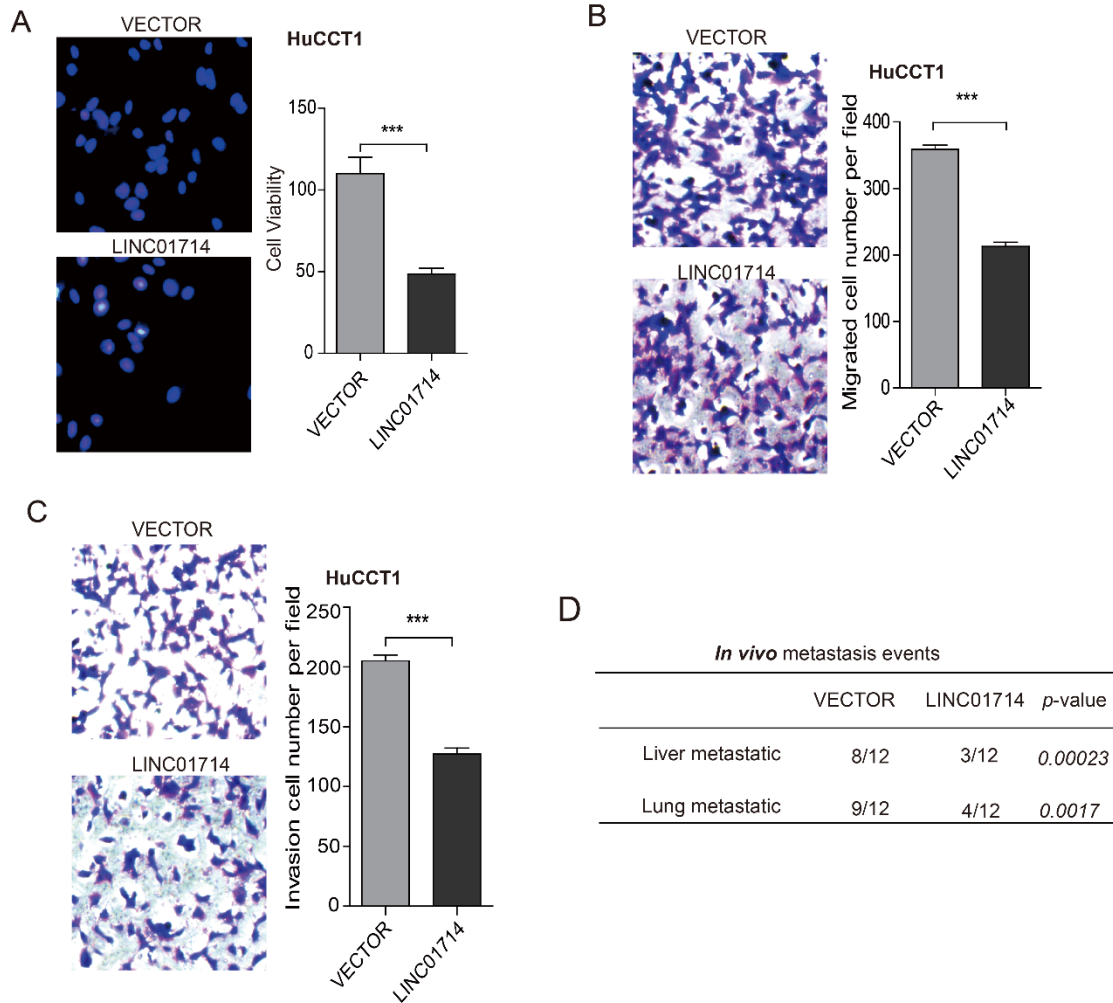

**Figure S4. LINC01714 suppresses cell proliferation, metastasis and invasion *in vitro* and *in vivo*.** (A) Cell viability assay shows LINC01714 inhibits CCA cell viability (HuCCT1 cell line). (B) The effects of LINC01714 on CCA cell migration (HuCCT1 cell line). (C) The effects of LINC01714 on CCA cell invasion (HuCCT1 cell line). (D) Table summarizes the liver and lung metastatic events comparing between the LINC01714 and control groups. Values are shown as mean  $\pm$  SEM, \*\* $P < 0.01$  and \*\*\* $P < 0.001$ .

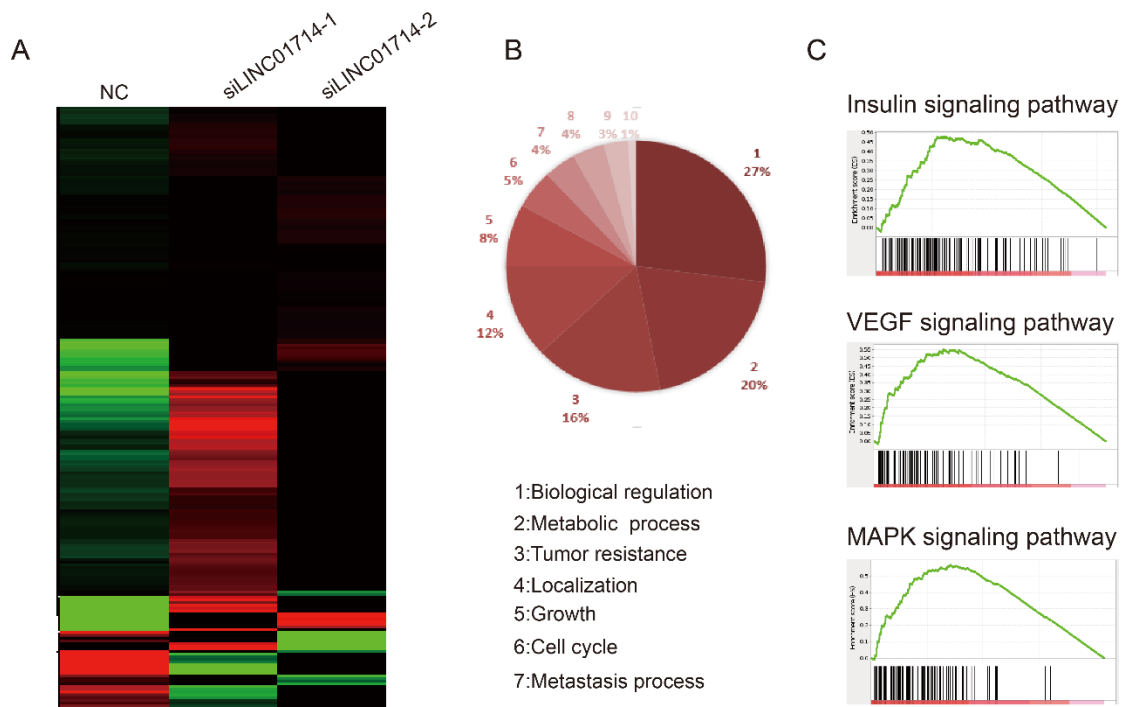

**Figure S5. LINC01714 impacts the expression of genes involved in tumor-related pathways.** (A) Heatmap shows gene expression in CCLP1 cell lines that were transfected with LINC01714 siRNAs or mock controls. (B) Pie chart shows the proportion of differentially expressed genes (si-LINC01714 cells v.s. control cells) in top ranked biological processes. (C) Results of GSEA analysis of differentially expressed genes, including Insulin signaling pathway, VEGF signaling pathway and MAPK signaling pathway.

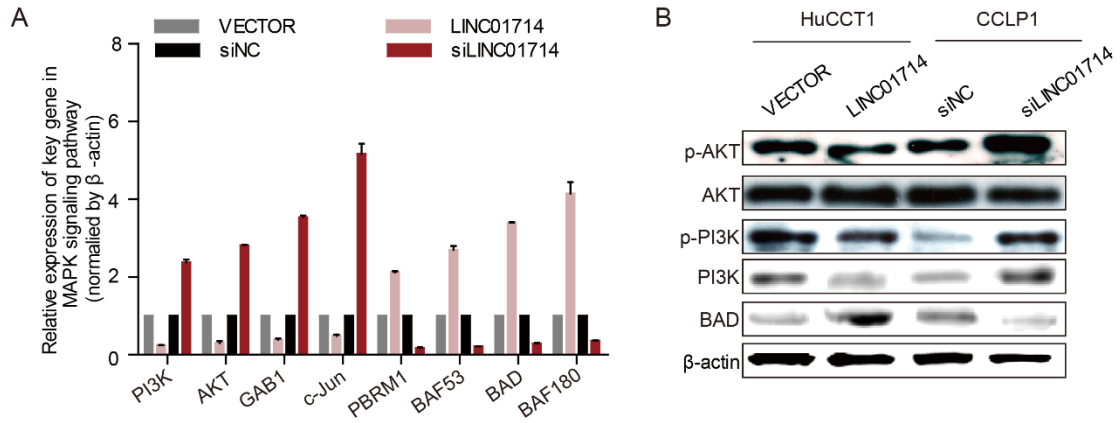

**Figure S6. Validation of mRNA and protein change of some key tumor-related genes after knockdown of LINC01714.** (A) Relative mRNA levels (quantitative real-time PCR) of selected genes from the top ranked pathways affected by LINC01714. (B) Western blotting results of selected genes (PI3K and BAD) in HuCCT1 and CCLP1 cell lines, where  $\beta$ -actin serves as control.



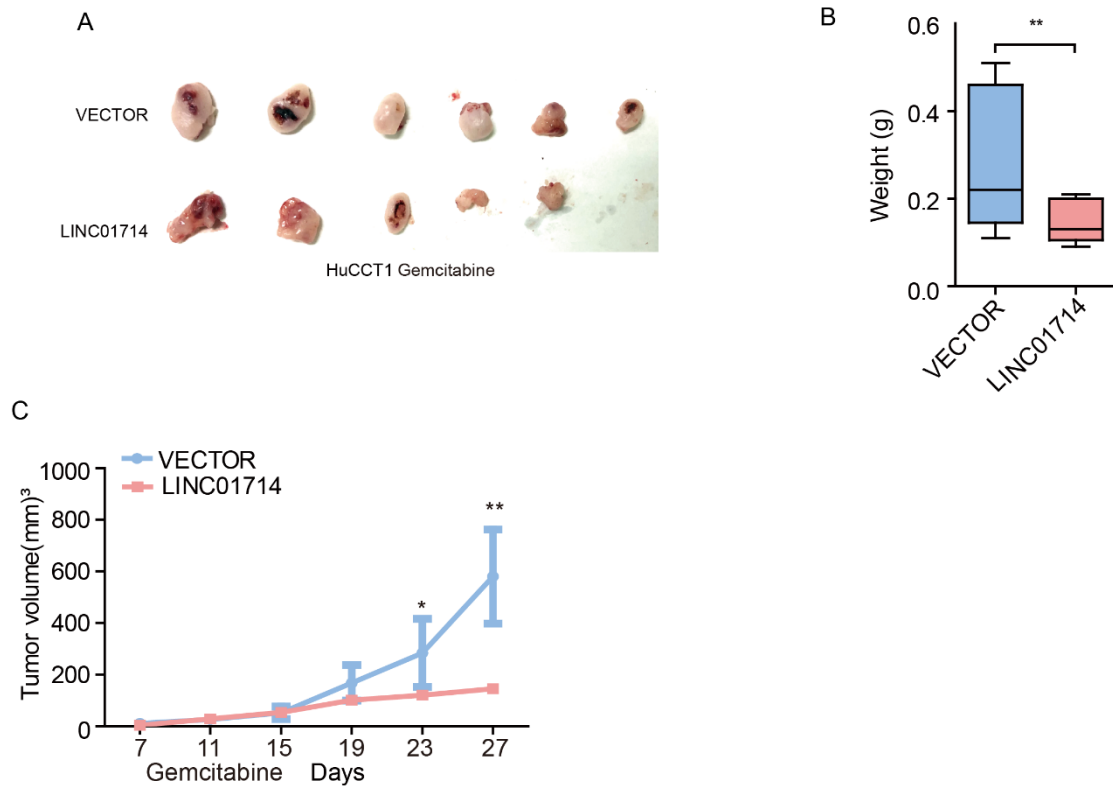

**Figure S7. LINC01714 enhance Gemcitabine sensitivity in CCA cells.** (A) Tumor weight of LINC01714 overexpression and control mice groups. (B) The change of tumor weights in LINC01714 overexpression and control mice groups. (C) The change of tumor volumes in LINC01714 overexpression and control mice groups.

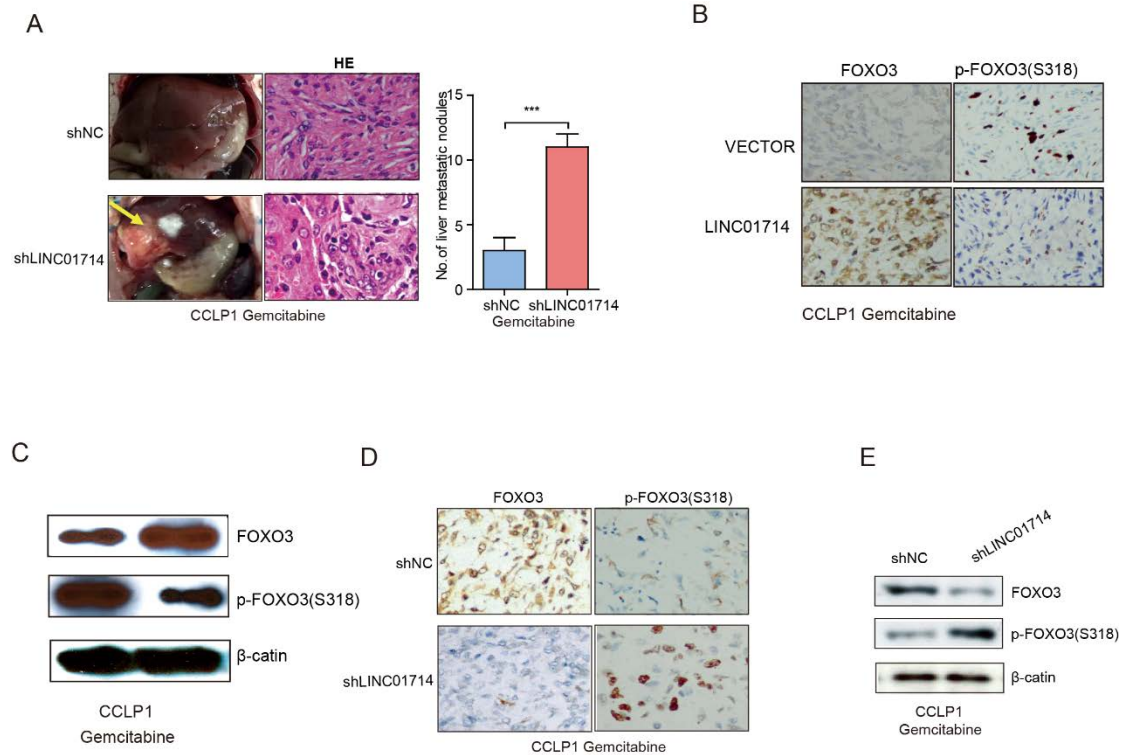

**Figure S8.** (A) Representative data showed that knockdown of LINC01714 promoted the liver metastasis of CCA tumor in nude mice bearing subcutaneous tumor xenografts from Gemcitabine treated CCLP1 cells. (B) Representative IHC images of FOXO3 and phosphorylated FOXO3 (S318) protein in samples collected from nude mouse model bearing subcutaneous tumor xenografts from Gemcitabine treated CCLP1 cell lines with overexpressed LINC01714 or control transfection. (C) Western blot results of FOXO3 and phosphorylated FOXO3 (S318) in Gemcitabine treated CCLP1 cells with overexpressed LINC01714 or control transfection. (D) Representative IHC images of FOXO3 and phosphorylated FOXO3 (S318) protein in samples collected from nude mouse model bearing subcutaneous tumor xenografts from Gemcitabine treated CCLP1 cell lines with knockdown LINC01714 or control transfection. (E) Western blot results of FOXO3 and phosphorylated FOXO3 (S318) in Gemcitabine treated CCLP1 cells with knockdown LINC01714 or control transfection.

## Supplemental Tables

**Supplemental Table 1.** lncRNAs that show both differential expression and significant survival difference.

| Gene_id           | log2FoldChange | de_fdr      | logrank_pvalue | Gene_type            | Gene_name       |
|-------------------|----------------|-------------|----------------|----------------------|-----------------|
| ENSG00000281655.1 | -6.315765241   | 3.47E-08    | 0.035567125    | lincRNA              | RP11-817J15.3   |
| ENSG00000267629.3 | -5.034242992   | 1.69E-13    | 0.013442901    | processed_transcript | AC138430.4      |
| ENSG00000251164.1 | -4.572731764   | 1.98E-07    | 0.025410985    | lincRNA              | HULC            |
| ENSG00000279711.1 | -4.086224252   | 1.37E-07    | 0.012992475    | TEC                  | AP004782.1      |
| ENSG00000275088.1 | -4.064618044   | 2.40E-20    | 0.002270004    | lincRNA              | RP11-442O1.3    |
| ENSG00000228620.1 | -3.946917768   | 6.27E-08    | 0.012173139    | antisense            | RP3-434P1.6     |
| ENSG00000227634.1 | -3.906270329   | 1.95E-09    | 0.047371921    | lincRNA              | LINC01714       |
| ENSG00000251314.2 | -2.856647177   | 4.86E-06    | 0.000494717    | antisense            | CTD-2337A12.1   |
| ENSG00000203307.2 | -2.797815894   | 0.000173984 | 0.022343837    | antisense            | RP11-375H19.2   |
| ENSG00000279022.1 | -2.577617753   | 9.66E-08    | 0.026864054    | TEC                  | RP11-250B2.4    |
| ENSG00000281903.1 | -2.55107769    | 9.89E-06    | 0.038695937    | lincRNA              | AF127936.7      |
| ENSG00000250328.4 | -2.536761504   | 0.002095646 | 0.026862483    | antisense            | MGC32805        |
| ENSG00000259343.4 | -2.513123581   | 1.82E-08    | 0.024435357    | antisense            | TMC3-AS1        |
| ENSG00000240006.1 | -2.205091894   | 2.34E-07    | 0.023520348    | lincRNA              | RP11-200A1.1    |
| ENSG00000231680.1 | -2.122668031   | 0.003101925 | 0.006699473    | lincRNA              | AP003774.6      |
| ENSG00000225913.2 | -1.938365401   | 0.003866308 | 0.045482483    | lincRNA              | RP11-57C13.6    |
| ENSG00000221571.3 | -1.862158858   | 0.007476982 | 0.024757079    | lincRNA              | RNU6ATAC35P     |
| ENSG00000272884.1 | -1.788725901   | 0.042063074 | 0.002694654    | processed_transcript | RP11-104H15.10  |
| ENSG00000253701.2 | -1.745978679   | 0.01277356  | 0.022821766    | lincRNA              | AL928768.3      |
| ENSG00000278266.1 | -1.680893647   | 0.005573992 | 0.045220415    | lincRNA              | RP11-575F12.3   |
| ENSG00000281920.1 | -1.655627324   | 0.025260956 | 0.037759906    | lincRNA              | RP11-418H16.1   |
| ENSG00000275995.1 | -1.575885757   | 0.015926017 | 0.001949641    | lincRNA              | CTD-2240J17.4   |
| ENSG00000267064.1 | -1.549854254   | 1.44E-05    | 0.020994026    | antisense            | UXT-AS1         |
| ENSG00000225335.3 | -1.487941018   | 8.31E-06    | 0.018339461    | antisense            | XXbac-B476C20.9 |
| ENSG00000271926.1 | -1.397268755   | 0.024906399 | 0.014552616    | lincRNA              | CTD-2376I4.1    |
| ENSG00000215014.4 | -1.337914254   | 0.00052673  | 0.015535774    | lincRNA              | RP5-832C2.5     |
| ENSG00000271849.1 | -1.327200562   | 0.013030901 | 0.015253218    | lincRNA              | CTC-332L22.1    |
| ENSG00000272402.1 | -1.212731718   | 4.59E-06    | 0.026000846    | antisense            | RP1-30M3.6      |
| ENSG00000225177.4 | -1.185461501   | 0.004898683 | 0.029954382    | antisense            | RP11-390P2.4    |
| ENSG00000272787.1 | -1.124584494   | 0.022229027 | 0.037234586    | lincRNA              | KB-226F1.2      |
| ENSG00000229980.4 | -1.097072305   | 0.001770032 | 0.022315592    | processed_transcript | TOB1-AS1        |
| ENSG00000260296.1 | 1.07791118     | 0.029621624 | 0.047813154    | sense_overlapping    | RP11-395I6.3    |
| ENSG00000238113.5 | 1.175596134    | 0.040278879 | 0.041349463    | lincRNA              | LINC01410       |
| ENSG00000262089.1 | 1.360696622    | 0.002349923 | 0.038034976    | lincRNA              | RP11-589P10.5   |
| ENSG00000279738.1 | 1.370097106    | 0.000226011 | 0.048910858    | sense_overlapping    | RP5-1014D13.2   |
| ENSG00000259865.1 | 1.520989486    | 5.42E-07    | 0.023038278    | lincRNA              | RP11-488L18.10  |

|                   |             |             |             |                      |                 |
|-------------------|-------------|-------------|-------------|----------------------|-----------------|
| ENSG00000255320.1 | 1.522062153 | 0.001875528 | 0.010398007 | antisense            | RP11-755F10.1   |
| ENSG00000226091.6 | 1.534390089 | 0.034011629 | 0.040041451 | lincRNA              | LINC00937       |
| ENSG00000275936.1 | 1.547541837 | 0.030146676 | 0.030988066 | antisense            | RP1-278C19.8    |
| ENSG00000235852.1 | 1.963549688 | 0.041261702 | 0.047222239 | antisense            | AC005540.3      |
| ENSG00000261693.1 | 2.021832009 | 0.014785295 | 0.001220763 | antisense            | RP13-467H17.1   |
| ENSG00000273416.1 | 2.04661075  | 0.010155328 | 0.048350333 | lincRNA              | RP4-597N16.4    |
| ENSG00000258285.1 | 2.093888126 | 0.003431447 | 0.011215287 | lincRNA              | TESC-AS1        |
| ENSG00000226510.1 | 2.174101277 | 0.030654949 | 0.039966869 | antisense            | UPK1A-AS1       |
| ENSG00000267108.1 | 2.213375137 | 0.048983664 | 0.02282787  | lincRNA              | RP11-861E21.1   |
| ENSG00000228008.1 | 2.228775111 | 0.033833091 | 0.026489778 | antisense            | CTD-2330K9.3    |
| ENSG00000230438.6 | 2.231840301 | 5.15E-06    | 0.034237866 | lincRNA              | SERPINB9P1      |
| ENSG00000273424.1 | 2.244559713 | 0.00019409  | 0.031407104 | lincRNA              | CTA-223H9.9     |
| ENSG00000262001.1 | 2.333422411 | 5.96E-07    | 0.049475712 | antisense            | DLGAP1-AS2      |
| ENSG00000280167.1 | 2.377538748 | 0.021896494 | 0.004531157 | TEC                  | RP11-867G2.4    |
| ENSG00000227356.2 | 2.583008589 | 0.018589351 | 0.013461062 | lincRNA              | LINC00866       |
| ENSG00000270035.1 | 2.595498079 | 0.003748924 | 0.02220186  | lincRNA              | RP11-338N10.2   |
| ENSG00000231057.3 | 2.614368422 | 0.004578765 | 0.046527069 | antisense            | RP11-122M14.1   |
| ENSG00000255737.2 | 2.651276946 | 3.75E-06    | 0.047021161 | antisense            | AGAP2-AS1       |
| ENSG00000274414.1 | 2.693845928 | 0.000120645 | 0.010792709 | lincRNA              | RP5-965G21.4    |
| ENSG00000260989.1 | 2.808254089 | 0.00553614  | 0.001975927 | antisense            | LA16c-395F10.2  |
| ENSG00000249526.1 | 2.846937981 | 0.015883413 | 0.006047915 | lincRNA              | CTB-35F21.1     |
| ENSG00000227014.4 | 2.887439732 | 0.00331758  | 0.000655518 | antisense            | AC007285.6      |
| ENSG00000254987.1 | 3.113178677 | 0.009640985 | 0.021360517 | lincRNA              | RP11-563P16.1   |
| ENSG00000213793.4 | 3.137836786 | 9.60E-09    | 0.026264348 | lincRNA              | ZNF888          |
| ENSG00000244502.2 | 3.248769155 | 0.042037388 | 0.044604571 | antisense            | HDAC11-AS1      |
| ENSG00000279353.1 | 3.478782697 | 0.008077798 | 0.021848457 | TEC                  | RP11-864N7.4    |
| ENSG00000244137.1 | 3.546325693 | 0.002389954 | 0.034715373 | antisense            | RP11-99J16__A.2 |
| ENSG00000265443.1 | 3.58841173  | 0.027800632 | 0.011484914 | lincRNA              | CTD-2349P21.6   |
| ENSG00000279721.1 | 3.661060668 | 0.019543792 | 0.018273457 | TEC                  | RP11-416H1.2    |
| ENSG00000250748.5 | 3.677456099 | 0.013540169 | 0.03215293  | lincRNA              | RP11-230G5.2    |
| ENSG00000261801.4 | 3.847665589 | 3.68E-13    | 0.004038022 | antisense            | LOXL1-AS1       |
| ENSG00000275484.1 | 3.852599275 | 1.30E-09    | 0.043624511 | lincRNA              | CTC-1337H24.4   |
| ENSG00000228742.8 | 3.880234944 | 0.004543549 | 0.004777285 | lincRNA              | RP5-884M6.1     |
| ENSG00000223949.5 | 4.117953257 | 0.001911548 | 0.007306513 | antisense            | ROR1-AS1        |
| ENSG00000261266.2 | 4.160071955 | 0.008908502 | 0.002689953 | antisense            | CTD-2196E14.5   |
| ENSG00000272130.1 | 4.246939793 | 0.006394118 | 0.003448526 | lincRNA              | RP11-360I2.1    |
| ENSG00000230316.5 | 4.311870046 | 2.10E-06    | 0.020371264 | antisense            | FEZF1-AS1       |
| ENSG00000273786.1 | 4.397910076 | 0.006217919 | 0.004936951 | sense_intronic       | RP11-133K1.11   |
| ENSG00000183535.8 | 4.629727144 | 0.001827452 | 0.041171516 | antisense            | COL18A1-AS1     |
| ENSG00000227407.1 | 4.800923894 | 0.000146325 | 0.040765063 | antisense            | AC008746.3      |
| ENSG00000224481.1 | 4.965913722 | 0.001091067 | 0.010438601 | lincRNA              | RP11-495P10.3   |
| ENSG00000268496.1 | 5.547401216 | 8.79E-08    | 0.044475934 | sense_intronic       | CTD-2587H19.2   |
| ENSG00000231290.4 | 7.09442384  | 2.66E-10    | 0.04945905  | processed_transcript | APCDD1L-AS1     |
